# Supplementary material
Source: ML conference proceedings conference paper supplement (https://openreview.net/forum?id=--2oFTBNak)
Supplement: supplementary_material [file attachment]

## Appendices

### A

In this appendix we present the general version of Definition 3 allowing harm and benefit to be measured along specific causal paths.

The path-specific counterfactual harm measures the harm caused by an action  $A = a$  compared to a default action  $A = \bar{a}$  when, rather than generating the counterfactual outcome by including all causal paths from  $A = \bar{a}$  to outcome variables  $Y$ , we consider only the effect along certain paths  $g$ . This is somewhat analogous to the path specific causal effect [5], as we are using the  $g$ -specific intervention  $A = \bar{a}$  on  $Y$  in the counterfactual world relative to reference  $A = a$  (the factual action).

**Definition 9** (Path-specific counterfactual harm & benefit). *Let  $G$  be the DAG associated with model  $\mathcal{M}$  and  $g$  be the edge sub-graph of  $G$  containing the paths we include in the harm analysis. The path specific harm caused by action  $A = a$  compared to default action  $A = \bar{a}$  is given by*

$$h_g(a, x, y; \mathcal{M}) = \int_{y^*} P(Y_{\bar{a}, \mathcal{M}_g} = y^* | a, x, y; \mathcal{M}) \max\{0, U(\bar{a}, x, y^*) - U(a, x, y)\} \quad (12)$$

$$= \int_{y^*, e} P(Y_{\bar{a}} = y^* | e; \mathcal{M}_g) P(e | a, x, y; \mathcal{M}) \max\{0, U(\bar{a}, x, y^*) - U(a, x, y)\} \quad (13)$$

Where  $Y_{\bar{a}, \mathcal{M}_g}$  is the counterfactual outcome  $Y$  under intervention  $do(A = \bar{a})$  in model  $\mathcal{M}_g$  where  $\mathcal{M}_g$  is formed from  $\mathcal{M}$  by replacing the causal mechanisms for each variable  $f^i(pa^i, e) \rightarrow f_g^i(pa^i(g)^*, e) = f^i(pa^i(g)^*, pa^i(\bar{g}), e)$ , where  $Pa^i(\bar{g})$  is the set of parents of  $V^{(i)}$  that are not linked to  $V^{(i)}$  in  $g$  and  $pa^i(\bar{g})$  is the factual state of those variables.  $E = e$  is the joint state of the exogenous noise variables in  $\mathcal{M}$ . Likewise, the expected benefit is

$$b_g(a, x, y; \mathcal{M}) = \int_{y^*} P(Y_{\bar{a}, \mathcal{M}_g} = y^* | a, x, y; \mathcal{M}) \max\{0, U(a, x, y) - U(\bar{a}, x, y^*)\} \quad (14)$$

Note that if we following the construction of  $\mathcal{M}_g$  in [5] we get that  $\mathcal{M}_g$  is formed from  $\mathcal{M}$  by i) partitioning the parent set for each variable  $V^{(i)}$  in  $\mathcal{M}$  into  $Pa^i = \{Pa^i(g), Pa^i(\bar{g})\}$  where  $Pa^i(g)$  are the parents that are linked to  $V^{(i)}$  in  $g$  and  $Pa^i(\bar{g})$  is the complimentary set, ii) replacing the mechanisms for each variable with  $f^i(pa^i, e^i) \rightarrow f_g^i(pa^i, e^i) = f^i(pa^i(g)^*, pa^i(\bar{g}), e^i)$  where  $pa^i(\bar{g})$  takes the value of  $PA^i(\bar{g})_z$  in  $\mathcal{M}$  where  $A = z$  is the reference action. However, in [12] and [14] we condition on the state of all factual variables and assume no unobserved confounders, and the reference action is the factual action state. Therefore the state of  $PA^i(\bar{g})_a$  in  $\mathcal{M}$  is equal to the factual state of these variables, giving our simplified construction for  $\mathcal{M}_g$ .

We give examples of computing the path-specific harm in Appendices B-C

### B

In this appendix we discuss the omission problem and pre-emption problem [13], and the preventing worse problem [15], and show how these can be resolved using our definition of counterfactual harm (Definition 3 and its path-specific variant Definition 9).

**Omission Problem:** Alice decides not to give Bob a set of golf clubs. Bob would be happy if Alice had given him the golf clubs. Therefore, according to the CCA, Alice's decision not to give Bob the clubs causes Bob harm. However, intuitively Alice has not harmed Bob, but merely failed to benefit him [13].

**Solution:** The omission problem relies on the judgement that Alice does not have a ethical obligation to provide Bob with golf clubs, therefore her choice not to do so does not constitute harm to Bob. In our definition of harm, this judgement is encoded by Alice not giving Bob clubs by default, i.e. the desired harm query is the harm 'compared to the world where Alice does not give Bob clubs'. To compute the harm we construct the model  $\mathcal{M}$  comprising of two variables; Alice's action  $A \in \{0, 1\}$

where  $A = 0$  indicates ‘Bob not given clubs’ and  $A = 1$  ‘Bob given clubs’, and outcome  $Y \in \{0, 1\}$  where  $Y = 1$  indicates ‘Bob has clubs’ and  $Y = 0$  indicates ‘Bob does not have clubs’. By default, Alice is not expected to give Bob clubs, which is encoded by choosing the default action  $A = \bar{a}$  where  $\bar{a} = 0$ . The causal mechanism for  $Y$  is  $y = a$ , i.e. Bob has clubs iff he is given them. Whatever utility function describes Bob’s preferences, the action  $A = 0$  causes no harm in this model (Lemma 3 Appendix J) as  $P(Y_0 = y^* | A = 0, Y = y) = \delta(y^* - y)$  (factual  $a$  and counterfactual  $\bar{a}$  are identical) and for non-zero harm we require  $y^* \neq y$ .

Note there are other reasonable scenarios where Alice’s actions would constitute harm. For example, if Alice was a clerk in a golf shop and Bob had pre-paid for a set of golf clubs, we could claim that ‘the clerk Alice harmed Bob by not giving him golf clubs’. In this case, we would expect Alice to give Bob the clubs by default (she has a ethical obligation to do so) and the harm query we want (implied by our ethical assumptions about clerks) is where the default action is  $\bar{a} = 1$ . By choosing not to— $A = 0$ —Alice causes harm to Bob. For example, if Bob’s utility is  $U(y) = y$  (i.e. 1 for clubs, 0 for no clubs), then the harm caused by Alice is  $P(Y_{A=1} = 1 | A = 0, Y = 0) = 1$ . So we can see that the choice of default action is vital for expressing these different normative assumptions.

**Preemption Problem:** Alice robs Bob of his golf clubs. A moment later, Eve would have robbed Bob of his clubs. Therefore, Alice’s action does not cause Bob to be worse off as he would have lost his clubs regardless of her actions, and so by the CCA Alice does not harm Bob by robbing him. However, intuitively Alice harms Bob by robbing him, regardless of what occurs later [13].

Let  $A = \{1, 0\}$  denote Alice {robbing, not robbing} Bob respectively, and similarly  $E = \{1, 0\}$  for Eve.  $B = \{1, 0\}$  denotes Bob {has clubs, does not have clubs}. Assume Bob’s utility is  $U(b) = b$ . The causal mechanisms are  $e = 1 - a$  (Eve always robs Bob if Alice doesn’t) and  $b = 1 - a \vee e$  (Bob has no clubs if either Alice or Eve robs him). See Figure 3 for the causal model depicting these variables.

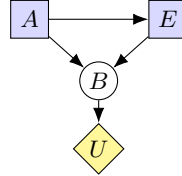

Figure 3: SCM depicting the preemption problem.

691

Note that while Alice’s action is an actual cause of Bob not having clubs, it is also an actual cause of Eve not robbing Bob, which is an event equally as bad as Alice robbing Bob. Intuitively, when we claim that Alice robbing Bob was harmful, we are making a claim about the effects of Alice’s actions on Bob independently of their effect on Eve’s actions (independent of the effect that her action has mediated through Eves action, preventing Eve from robbing Bob), i.e we are concerned with the direct harm caused by Alice’s actions on Bob.

The relevant harm query is the path-specific harm where we compare to the default action where Alice does not rob Bob,  $\bar{a} = 0$ . We want to determine the harm caused by Alice’s action independently of its effect on Eve’s action, which we do by blocking the path  $\bar{g} = \{A \rightarrow E\}$ . Applying Definition 9 amounts to replacing the mechanism for  $E$  with  $f^E(a) \rightarrow f_g^E(A = 1) = 0$ , i.e.  $E$  is evaluated for the factual value of  $A$ . We then compute the harm using the counterfactual default action  $A = 0$ , giving the counterfactual  $B(A = 0, E = 0) = 1$ , which gives a counterfactual utility of 1 compared to a factual utility of 0. Therefore Alice directly harmed Bob by robbing him.

Note we can also choose a different model where we explicitly represent the outcomes of the two agents decisions and the temporal order in which they occur (Figure 4). In this case the relevant harm query is essentially the same; the path specific harm where we determine the harm caused by Alice’s action independently of the effect it has on whether or not Eve robs Bob (i.e.  $\bar{g} = \{R_A \rightarrow R_E\}$ ).

**Preventing worse:** We provide two versions of the preventing worse problem [15] which have identical causal models but intuitively different harms attributed to Alice’s action.

Case 1: Bob has \$2. The thief Alice is stalking Bob in the marketplace and notices that Eve (a more effective thief) is also stalking Bob. Seeing Eve before Eve notices her, Alice decides to make her

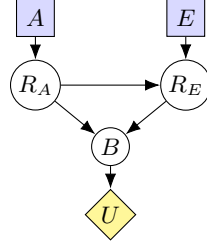

Figure 4: SCM depicting the preemption problem explicitly representing the temporal asymmetry between Alice and Eve’s actions effecting Bob.

713 move first. She steals \$1 from Bob. Eve was going to steal \$2 from Bob, but is incapable of doing so  
 714 if someone else robs him first (e.g. Bob realizes he’s been robbed and call for the police, making  
 715 further robbery impossible). Seeing that Bob was robbed by Alice she decides not to rob him.

716 Case 2: Eve has captured Bob and intends to torture him to death. Alice sees this, and is too far away  
 717 to prevent Eve from doing so. She has a line of sight to Bob (but not Eve) and can shoot him before  
 718 eve has a chance to torture him to death, resulting in a painless death.

719 The causal model describing both of these cases is depicted in Figure 5. Let  $E = \{1, 0\}$  denote  
 720 if Eve is present or not,  $A \in \{1, 0\}$  be Alice’s action (rob, shoot) or not,  $AB \in \{1, 0\}$  denote the  
 721 outcome following Alice’s action (Bob is robbed of \$1 / bob is shot, or not) and let  $EB \in \{1, 0\}$   
 722 denote Eves action on Bob (Bob is robbed of \$2 / Bob is tortured, or not). Let  $Y \in \{0, 1, 2\}$  denote  
 723 Bob’s outcome, with 2 being the best (Bob has \$2 in Case 1, Bob survives in Case 2), 1 being the  
 724 second worst (Bob has \$1 in Case 1, is killed painlessly in Case 2), and 0 the worst (Bob has \$0 in  
 725 Case 1, died painfully in Case 2). The causal mechanisms are  $a = e$  (e.g. Alice shoots/robs if Eve is  
 726 present),  $ab = a$  (Alice’s bullet hits with certainty / successfully robs with certainty),  $eb = e(1 - ab)$   
 727 (Eve tortures Bob if she is present and he is not shot / eve robs Bob if she is present and hasn’t been  
 728 robbed already), and  $y = ab + 2(1 - ab)(1 - eb)$  (Case 1: if Bob is shot he dies quickly, else if Eve  
 729 tortures him he dies slowly, else he lives, Case 2: Bob has \$2 if not robbed, \$1 if robbed by Alice, \$0  
 730 if not robbed by Alice and robbed by Eve).

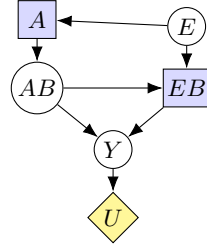

Figure 5: SCM depicting the preventing worse problem.

731 In Case 1, Alice intuitively harms Bob by robbing him. The argument supporting this is that Alice’s  
 732 robbery caused Bob to lose \$1, regardless of the fact that Alice’s action prevented a worse robbery  
 733 by Eve. However, for Case 2 it is argued in [15] that Alice intuitively didn’t harm Bob. While Bob  
 734 died due to Alice shooting him, this action was intended to prevent a worse outcome from occurring  
 735 (Bob being tortured to death), which would have happened with certainty had Alice not shot him.  
 736 However, these two scenarios are described by equivalent causal models—only the variables have  
 737 been re-labeled. However, the ethical assumptions differ between Case 1 and 2.

738 From this we conclude that to satisfactorily describe these two situations we need two different harm  
 739 queries. In either case, one of these harm queries is the morally relevant one and the other is not, and  
 740 to do this we use the path-independent and path-specific harms. This ‘path dependence’ of harm has  
 741 been noted in psychology research, where people are more likely to attribute harm to cases where the  
 742 agent is a direct cause of that harm rather than harm occurring as a side-effect of their actions [93].  
 743 Note, this is no different than in causal analysis where in certain problems the casual effect is the  
 744 desired query and in others the path-specific effect is the desired query [5]. For Case 1 we use the  
 745 path-specific harm (Definition 9) to determine the harm caused by Alice robbing Bob independently

of what effect it had on Eve’s action. We block the path  $\bar{g} = \{AB \rightarrow EB\}$  and use the default action  $\bar{a} = 0$ . In the counterfactual world, this gives  $AB = 0$  and  $EB = f^{EB}(A = 1, E = 1) = 0$ , and therefore  $Y = 2$ , and so the direct harm of Alice robbing Bob is  $2 - 1 = 1$  compared to not robbing him. For Case 2, we note that while Alice shooting Bob is arguably intrinsically harmful (as is captured by the direct harm of 1 caused by  $A = 1$  if we calculate the path-specific harm as in Case 1), this is not the morally relevant harm that we are referring to when we say that intuitively Alice did not harm Bob by shooting him. The reason Alice fired the shot was precisely because of its mediating effect on  $Y$  through Eve’s actions (preventing her from torturing him to death). From this we infer that the morally relevant harm in this case is the path-independent harm. This we calculate using Definition 3 and the default action  $\bar{a} = 0$ , which in the counterfactual world gives  $AB = 0$ ,  $EB = 1$ ,  $Y = 0$  and hence  $U = 0$ , compared to the factual utility  $U = 1$ , giving the desired result that Alice did not harm Bob compared to not shooting him. Note that if we favoured the path-independent or path-dependent harm a priori this would either fail to detect harm in Case 1 or incorrectly attribute harm to Alice in Case 2.

We argue from these two examples that there is no single causal formula for harm that is correct in all scenarios—in some the morally relevant measure of harm is path-specific (e.g. the direct harm), in others it is the path-independent harm. This is in contrast to other approaches to define harm with a single causal formula that applies to all scenarios, namely [8], and we discuss this approach and provide counterexamples to it in Appendix D.

## C

In this Appendix we discuss selecting and interpreting default actions, harmful events, and various edge cases not covered in the main body of our paper such as harmful default actions. Note that while the CCA (Definition 2) states ‘[the action] had not been performed’, this should not be interpreted as ‘do nothing’, as doing nothing is often a valid action choice and should be included as an element of  $A$ . Instead, we argue that statements about harm often implicitly assume some default action, often following from ethical or normative assumptions (although this is not always the case). Indeed, in Appendix D we show in Example 3 that being able to enforce a unique default action is vital in some scenarios to give intuitive results.

Our definition of harm treats the default action as an integral part of the harm query, just as a reference treatment is necessary when defining treatment effects [82]. These default-dependent measures of harm can be converted to default-independent measures if desired, e.g. by taking the max over all default actions, but in all of the examples we explore this is not desirable. We also note that while the examples outlined in the main text assume deterministic default actions, it is trivial to extend our definitions to non-deterministic default actions by replacing  $\text{do}(A = \bar{a})$  in Definition 3 with a soft intervention (e.g. [17]). For examples of how the default action resolves the omission problem, and when path-specific and path-independent harm should be used, see Appendix B.

**Default actions:** In some cases harm is attributed to an agent by comparing to normative actions or policies, and so the default action is often implied by the situation or determined by normative assumptions (e.g. Example 1 below). For example, in a case of negligence a doctor’s actions may be compared to clinical guidelines, or in a randomized control trial the harm caused by a drug is typically determined by comparing to the outcomes that would have occurred if the trial participants had instead been given a placebo. This is not always the case however (Example 2). The relevant harm query can also compare to actions that the agent could never take (Example 3). While some have argued against comparative accounts on the grounds that it is not always clear which comparison is needed [35], this problem arises due to the ambiguity of statements about harm rather than due to a problem with its formal definition (note, we do not consider scenarios where the agent’s action alters the user’s utility function). Clearly, there is not a single universal comparison or default action that is suitable for all situations (this assumption leads to the omission problem, described in Appendix B), and the ability to explicitly choose the comparison is a feature rather than a fault with the CCA.

**Example 1:** The claim ‘the doctor harmed the patient by not treating them’ and ‘the bystander with no medical training failed to benefit the patient by not treating them’ both tacitly assume different default actions. In the first, the doctor has an ethical obligation to treat the patient (e.g. the Hippocratic oath), and likewise the patient can expect to be treated by the doctor. Hence if they are not treated, harm can occur. In the second, the bystander may have no ethical obligation to help the patient (depending

on our ethical assumptions) and so the intuitive choice of default action is to not treat the patient. In both of these examples, the ‘correct’ default action depends on the situation and in these examples is informed by our assumptions as to the ethical obligations of the agent.

**Example 2:** Consider a drug that a doctor is expected to provide to a patient which rarely causes severe side effects. For a given patient, those side effects occur, and clearly the drug has harmed the patient. Perhaps the most obvious harm measure to capture this would be the total harm caused by the treatment compared to the default action where the doctor did not treat the patient at all, or provided them with a different treatment. Each of these is a different but valid harm query, and the correct one will depend on the situation. For example if we are measuring the harm due to the doctors negligence, we should compare to the normative default action alone (and should find zero harm due to negligence as the doctor followed the correct protocol), whereas if we are trying to establish harm caused by the drug to this patient due to the side effects it caused, we should use the default ‘no treatment’.

**Example 3:** How can we deal with cases where every action available to the agent is harmful? In this case harm is still measured compared to some default action, even if the action is idealized and not actually available to the agent. For example, if a doctor is forced at gun point to choose between administering two poisons that will harm the patient, we can still measure this harm compared to the counterfactual action where the doctor does not treat the patient, even if this action is not available to the doctor.

**Harmful events:** Finally, we note that while we focus on harmful actions due to our focus on training ethical artificial agents, our results extend trivially to harmful events as actions are formally equivalent to events in the causal models we consider, and instead of default actions we can use default events.

## D Comment on Beckers et. al.

In this appendix we discuss an alternative proposal for qualitatively defining harm [8], which was developed following the presentation of our preliminary results. We describe this definition (which we refer to as BCH) and three examples where BCH leads to counter-intuitive results (intuitively harmful actions being identified as not harmful or vice versa). First we present a simplified version of the BCH definition of harm where we restrict our attention to attributing harm to single actions.

**Definition 10.**  $A = a$  rather than  $A = a'$  causes  $Y = y$  rather than  $Y = y'$  in the model  $M$  for exogenous noise state  $E = e$  iff;

1.  $A(e) = a$  and  $Y(e) = y$
2. There exists a set of environment variables  $W$  with factual state  $W(e) = w$  such that  $Y_{A=a', W=w}(e) = y'$
3.  $A = a$  is minimal; There is no strict subset of the set of variables  $\tilde{A} \subset A$  such that for  $\tilde{A} = \tilde{a}$  we can satisfy conditions 1. and 2.

In the following we will focus on scenarios where we can consider single action variables alone and so we can ignore condition 3 in Definition 10.

**Definition 11 (BCH harm).**  $A = a$  harms the user in model  $M$  and exogenous noise state  $E = e$ , if there exists an outcome  $Y = y$  an action  $A = a'$  such that,

- H1  $U(y) < d$  where  $d$  is the default utility
- H2  $\exists Y = y'$  s.t.  $A = a$  rather than  $A = a'$  causes  $Y = y$  rather than  $Y = y'$  and  $U(y') > U(y)$ .
- H3  $U(y) \leq U(y'')$  for the unique  $y''$  such that  $Y_{a'}(e) = y''$

If we restrict to deterministic models (i.e.  $P(E = e)$  deterministic), attempt to only determine if harm is non-zero rather than quantify how much harm is caused (i.e. map all non-zero harm values to 1), and assume that the users utility function is independent of the agents action  $A$  and the context  $X$  given the outcome  $Y$ , then it is possible to directly compare our harm measure to that proposed in BCH. First, we present three problematic cases where the BCH gives counter-intuitive results. We then attempt to diagnose why our approaches give different answers in these cases.

849 **Example 1: two thieves.** (repeat of Case 1 in Appendix B). Bob has \$2. The thief Alice is stalking  
850 Bob in the marketplace and notices that Eve (a more effective thief) is also stalking Bob. Seeing Eve  
851 before Eve notices her, Alice decides to make her move first. She steals \$1 from Bob. Eve was going  
852 to steal \$2 from Bob, but is incapable of doing so if someone else robs him first (e.g. Bob realizes  
853 he’s been robbed and call for the police, making further robbery impossible). Seeing that Bob was  
854 robbed by Alice she decides not to rob him. The causal model for this scenario is described below,

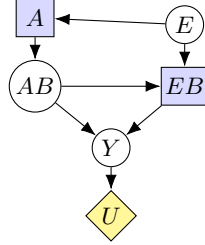

Figure 6: SCM depicting the two robbers problem.  $E \in \{1, 0\}$  denote Eve {present, not present},  $A = \{1, 0\}$  denotes Alice decides to {rob, not rob} Bob,  $AB \in \{1, 0\}$  denotes Bob is {robbed, not robbed} by Alice,  $EB = \{1, 0\}$  Eve attempts to {rob, not rob} Bob.  $Y$  denotes how much money Bob has finally. Causal mechanisms  $a = e$  (Alice robs if Eve is present),  $ab = a$  (Alice always succeeds in robbing Bob),  $eb = e(1 - ab)$  (Eve robs Bob if she is present and he hasn’t been robbed already), and  $y = ab + 2(1 - ab)(1 - eb)$  (if Bob is not robbed at all he has \$2, if Alice Robs him he has \$1, and if Eve robs him and Alice does not he has \$0).

855 Intuitively Alice harmed Bob by robbing him, but by Definition 11 she did not. The only available  
856 counterfactual action for Alice is  $\bar{a} = 0$ . This counterfactual action (with no contingencies) leads  
857 to the counterfactual outcome  $Y_{A=0}(e) = 0$ , i.e. if Alice doesn’t rob Bob then Eve will, resulting  
858 in a lower utility  $U(Y = 1) > U(Y = 0)$ . Therefore H3 is not satisfied and Alice did not harm  
859 Bob by robbing him. We discuss this problem further in Appendix B and argue that the morally  
860 relevant harm query in this scenario is the direct (path-specific) harm of Alice robbing Bob compared  
861 to not robbing him ( $\bar{a} = 0$ ), independent of the benefit caused by preventing Eve from robbing him  
862 (blocking  $\bar{g} = \{AB \rightarrow EB\}$ ). Applying Definition 9 it is simple to check the path-specific harm  
863 described is 1.

864 **Example 2: robber & Samaritan** An intuitive property of harm is that the harms caused by one  
865 agent’s actions should not by default be cancelled out by the another agents beneficial actions—e.g.  
866 stabbing someone is harmful, regardless of whether or not a doctor will treat the wound in response.  
867 This ability to disentangle agent A’s harm from agent B’s benefit is vital for determining harm  
868 in complex scenarios involving multiple actions or events. For example: Bob has \$1 and Alice  
869 steals it. Seeing this, Eve feels bad for Bob and later gifts Bob a dollar, restoring him to his initial  
870 funds. Intuitively we would say Alice harmed Bob and Eve benefited him, or at least it would be  
871 counter-intuitive to say that Alice robbing Bob was not harmful because at a later time Bob’s finances  
872 were restored by a second agent (Eve). The causal model describing this situation is depicted below,

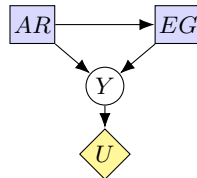

Figure 7: SCM depicting the preventing worse problem. Alice {robs, doesn’t rob} Bob (AR) is denoted  $AR = \{1, 0\}$ . Eve gives (EG) Bob money if she sees he has been robbed ( $eg = ar$ ). Bob’s money is his initial money, minus any theft and adding any gifts  $y = 1 - ar + eg$ . Let  $U(y) = y$ .

873 The intuitive default utility for this scenario is  $d = 1$  (Bob expects to have \$1), but as the factual  
874 outcome is  $Y = 1$  then H1 cannot be satisfied. To satisfy H1 we would need to choose a default  
875 utility  $d > 1$  which amounts to Bob having by default more money than he would have regardless  
876 of Alice robbing him (e.g. assuming Bob can expect to become richer following a robbery). We  
877 therefore either recover a counter-intuitive answer (Alice did not harm Bob by robbing him), or have



878 to use a counter-intuitive default utility that is hard to justify beyond choosing whichever value gives  
879 the desired answer.

880 Our approach is to measure the direct harm caused by  $A = 1$  (Alice robs) compared to  $\bar{a} = 0$  (Alice  
881 doesn't rob), blocking the path  $\bar{g} = \{AS \rightarrow EG\}$ . This disentangles that harm caused by Alice  
882 robbing Bob from the benefit due to this action causing Eve to help Bob. It is simple to check that  
883 this results in a harm of 1. As described in Appendix B, this is the intuitive choice of harm query  
884 as we are interested in the harm caused directly to Bob by Alice robbing him, independent of the  
885 indirect effect of causing Eve to benefit him. In other (causally equivalent) scenarios described in  
886 Appendix B, the intuitive harm query we desire if the total (path-independent) harm, and as with  
887 default actions this has to be implied from the context.

888 **Example 3: omission problem.** In this example we present an extension of the omission problem  
889 that is violated by the BCH definition of harm. The Phoenicians are a moderately wealthy people,  
890 collectively owning \$2. The Romans can decide to gift them an extra \$2 or do nothing, and they have  
891 no moral obligation to give them anything. Unbeknownst to the Romans, the Carthaginians decide  
892 that if the Romans don't give the Phoenicians anything they will attack them, stealing all of their  
893 money. But if the Romans do gift the Phoenicians \$2, the Phoenicians will become too powerful and  
894 the Carthaginians won't attack. The Phoenician's utility is equal to how much money they have.

895 The Romans decide not to gift the Phoenicians anything, and they are attacked by the Carthaginians  
896 and have all their money stolen. Intuitively, the Romans didn't harm the Phoenicians (any harm was  
897 caused by the Carthaginians)—instead the Romans failed to benefit them. However, by the BCH  
898 account the Roman's harmed the Phoenicians.

899 To see this, first note that if  $d \leq 0$  then the Carthaginians actions do not constitute harm, as the  
900 factual utility is equal to the default and H1 cannot be satisfied. This would be a counter-intuitive  
901 result, so we assume that  $d > 0$ . The Phoenicians end up with no money, so H1 is satisfied as  
902  $U(y) < d$ . H2 is also satisfied by a simple but-for counterfactual because if the Romans had given  
903 the Phoenicians money, the Carthaginians wouldn't have attacked and the Phoenicians would have \$4  
904 which is more than their factual \$0. Finally, H3 is satisfied by the same argument as H2. Therefore  
905 the Romans harmed the Phoenicians. Applying our methods, it is sufficient to note that the implied  
906 default action should be  $A = 0$  (By default we do not expect the Romans to give money to the  
907 Phoenicians, reflecting the ethical assumptions implicit in the 'failure to benefit' assertion) and this  
908 gives a counterfactual harm of zero because the factual and counterfactual actions are identical.

909 **Analysis:** Why do these issues arise? Firstly, the BCH account of harm proposes a single casual  
910 formula for harm that applies to all scenarios, allowing for any counterfactual action or contingency  
911 to establish harm much as is done in actual causality [34]. If H3 was not included, this could result in  
912 harm being attributed in cases of 'preventing worse' (as pointed out in [8] and described in Appendix  
913 B), but H3 is included to fix this by requiring that benefit does not occur in the case where no  
914 contingency is taken, which in these examples is the same as requiring that an action cannot be  
915 harmful if its total (path-independent) benefit is non-zero. But this is precisely the case in Example  
916 1, where Alice prevents a worse outcome but, intuitively, we would want to ascribe harm to her  
917 actions. By separating direct and indirect harm, we can see that her actions were indirectly beneficial  
918 (she prevented a worse robbery), but directly harmful, and in this scenario the morally relevant (i.e.  
919 'intuitive') measure of harm is the direct harm. In the equivalent Case 2 example in Appendix B, the  
920 harm query we intuitively want is the total harm rather than the path-specific harm. This points to the  
921 conclusion that a one-size-fits-all harm query is not tenable, given that the intuitive measures of harm  
922 we desire are sometimes path-dependent and sometimes path-independent.

923 Secondly, Example 2 suggests that approaches using default utilities are not tenable, because they  
924 preclude the possibility of the user being harmed by any action or event that occurred previously  
925 if, in the end, the user obtains the default utility. Clearly this is not the case in general—users can  
926 achieve the expected or default outcome (e.g. leaving the market with as much money as they came  
927 in with) and still have been harmed. The BCH therefore cannot robustly detect harm in cases where  
928 both benefit and harm occur unless we choose large values of  $d$  (essentially removing  $d$  from the  
929 analysis). But it is not clear how these default utility values can be justified beyond fixing a problem  
930 that they cause—seeing as these large values of  $d$  do not correspond to any utility the user can expect  
931 to have (e.g. in Example 2 it would require that the user can expect to be richer than they initially  
932 were following a robbery).

933 Thirdly, in Example 3 we see that by allowing for any default action the BCH account can end up  
 934 misattributing harm in cases where the agent has no ethical duty to act (or by extension, has a duty  
 935 to perform specific actions). This is because the BCH allows the counterfactual action to take any  
 936 value—in this case, the Romans gifting the Phoenicians money. This can be avoided by by not  
 937 attributing harm to the Romans using counterfactual actions that they could never be expected to take  
 938 from an ethical standpoint (i.e. using default actions). Just by allowing the Romans to (in theory)  
 939 give any positive amount of money, we could even make the harm they cause by not giving the  
 940 Phoenicians anything arbitrarily large. In conclusion, by evaluating over all possible actions that the  
 941 agent could take the BCH doesn't allow normative assumptions about actions (e.g. to do with the  
 942 ethical responsibility to act or not act) to be included in the harm query.

## 943 E

944 In this Appendix we prove Theorem 1. Noting that  $\max\{0, U(a, x, y) - U(\bar{a}, x, y)\} -$   
 945  $\max\{0, U(\bar{a}, x, y^*) - U(a, x, y)\} = U(a, x, y) - U(\bar{a}, x, y^*)$ , subtracting the expected harm from  
 946 the expected benefit (Def 3) gives,

$$\mathbb{E}[b|a, x; \mathcal{M}] - \mathbb{E}[h|a, x; \mathcal{M}] \quad (15)$$

$$= \int_{y, y^*} P(y, Y_{\bar{a}} = y^* | a, x; \mathcal{M}) (U(a, x, y) - U(\bar{a}, x, y^*)) \quad (16)$$

$$= \int_y P(y|a, x) U(a, x, y) - \int_{y^*} P(Y_{\bar{a}} = y^* | x) U(\bar{a}, x, y^*) \quad (17)$$

$$= \mathbb{E}[U|a, x] - \mathbb{E}[U|\bar{a}, x] \quad (18)$$

## 947 F

948 In this Appendix we derive the SCM model for the treatment decision task in examples 1 and 2, and  
 949 calculate the average treatment effect and counterfactual harm.

950 Patients who receive the default ‘no treatment’  $T = 0$  have a 50% survival rate.  $T = 1$  has a 60%  
 951 chance of curing a patient, and a 40% chance of having no effect, with the disease progressing as if  
 952  $T = 0$ , whereas  $T = 2$  has a 80% chance of curing a patient as a 20% chance of killing them, due to  
 953 some unforeseeable allergic reaction to the treatment.

954 Next we evaluate this expression for our two treatment by constructing an SCM for the decision task.  
 955 The patient’s response to treatment is described by three independent latent factors (for example  
 956 genetic factors) that we model as exogenous variables. Firstly, half of the patients exhibit a robustness  
 957 to the disease which means they will recover if not treated, which we encode as  $E^1 \in \{0, 1\}$  where  
 958  $e^1 = 1$  implies robustness with  $P(e^1 = 1) = 0.5$ . Secondly, the patients may exhibit a resistance to  
 959 treatment 1 indicated by variable  $E^2$ , with  $e^2 = 1$  implying resistance with  $P(e^2 = 1) = 0.4$ . Finally,  
 960 the patients can be allergic to treatment 2, indicated by variable  $E^3$  with  $e^3 = 1$  and  $P(e^3 = 1) = 0.2$ .  
 961 Given knowledge of these three factors the response of any patient is fully determined, and so we  
 962 define the exogenous noise variable as  $E^Y = E^1 \times E^2 \times E^3$  with  $P(e^Y) = P(e^1)P(e^2)P(e^3)$ .

963 Next we characterise the mechanism  $y = f(t, e^Y) = f(t, e^1, e^2, e^3)$  where  $f(0, e^Y) = [e^1 = 1]$   
 964 (untreated patients recover if they are robust),  $f(1, e_Y) = [e^1 = 1] \vee [e^2 = 0]$  (patients with  $T = 1$   
 965 recover if they are robust or non-resistant) and  $f(2, e_Y) = [e^3 = 0]$  (patients with  $T = 2$  recover if  
 966 they are non-allergic), where  $[X = x]$  are Iverson brackets which return 1 if  $X = x$  and 0 otherwise,  
 967 and  $\vee$  is the Boolean OR.

968 The recovery rate for  $T = 1$  and  $T = 2$  can be calculated with (1) to give  $P(Y_1 = 1) = P(e^1 =$   
 969  $1 \vee e^2 = 0) = 1 - P(e^1 = 0)P(e^2 = 1) = 0.8$ , and likewise  $P(Y_2 = 1) = P(e^3 = 0) = 0.8$ . Hence  
 970 the two treatments have identical outcome statistics (recovery/mortality rates), and all observational  
 971 and interventional statistical measures are identical, such as risk, expected utility and the effect of  
 972 treatment on the treated. Note as there are no unobserved confounders the recovery rate for action  
 973  $A = a$  is equal to  $\mathbb{E}[Y_a]$ .



We compute the counterfactual expected harm by evaluating (4), noting that  $Y_0^*(e) = 1$  if  $e^1 = 1$ ,  $Y_1^*(e) = 0$  if  $e^1 = 0$  and  $e^2 = 1$ , and  $Y_2^*(e) = 0$  if  $e^3 = 1$ . This gives  $P(Y_1 = 0, Y_0^* = 1) = 0$ , i.e. there are no values of  $e^Y$  that satisfy both  $Y_1(e) = 0$  and  $Y_0(e) = 1$ , and therefore  $\text{do}(T_1 = 1)$  causes zero harm. However,  $P(Y_2 = 0, Y_0^* = 1) = P(e^1 = 1)P(e^3 = 1) = 0.1$ , and so  $\text{do}(T_2 = 2)$  causes non-zero harm. This is due to the existence of allergic patients who are also robust, and will die if treated with  $T = 2$  but would have lived had  $T = 0$ .

## G

In this Appendix we derive the policies of agents 1-3 in Example 3. We note that outcome  $Y$  is described by a heteroskedastic additive noise model with the default action  $\bar{a}$  (no action) corresponding to  $A = 1$ ,  $K = 1$ . The expected harm is given by Theorem 5 with  $\sigma(\bar{a}) = 100$ ,  $\sigma(A = 2) = 100$ ,  $\sigma(A = 3) = 0$  and  $\sigma(A = 1, K) = 100K$ .  $\mathbb{E}[U|\bar{a}] = 100$ ,  $\mathbb{E}[U|A = 2] = 110$ ,  $\mathbb{E}[U|A = 3] = 80$  and  $\mathbb{E}[U|A = 1] = 100K$ , where we have used  $\text{Var}(KY) = K^2\text{Var}(Y)$  and  $\text{Var}(Y + 10) = \text{Var}(Y)$ .

Agent 1 takes action 1 and the maximum value  $K = 20$  as this extremizes  $\mathbb{E}[U|a]$ .

Agent 2 chooses  $a = \arg \max_a \{\mathbb{E}[Y|a] - \text{Var}(Y|a)\}$  which for each action is given by,

$$E[Y|A = 1] - \lambda \text{Var}(Y|A = 1) = 100K - 100^2 K^2 \lambda \quad (19)$$

$$E[Y|A = 2] - \lambda \text{Var}(Y|A = 2) = 110 - 100^2 \lambda \quad (20)$$

$$E[Y|A = 3] - \lambda \text{Var}(Y|A = 3) = 80 \quad (21)$$

For action 1 the optimal  $K = 1/200\lambda$ , which gives  $E[Y|A = 1] - \text{Var}(Y|A = 1) = 1/4\lambda$ . Note that  $1/4\lambda > 110 - 100^2 \lambda$  for  $\lambda < 0.0032$ , which  $80 > 1/4\lambda$  for  $\lambda > 0.003125$ . Therefore there is no value of  $\lambda$  for which agent 2 selects action 2, choosing action 1 for  $\lambda < 0.003125$  and action 3 otherwise.

For agent 3 applying Theorem 5 gives,

$$\mathbb{E}[Y|A = 1] - \lambda \mathbb{E}[h|A = 1, K] = 100K - \lambda \left[ \frac{|100(K - 1)|}{\sqrt{2\pi}} e^{-\frac{1}{2}} + \frac{100(K - 1)}{2} \left( \text{erf} \left( \frac{\text{sign}(K - 1)}{\sqrt{2}} \right) - 1 \right) \right] \quad (22)$$

$$= \begin{cases} 100K - 8.332(K - 1)\lambda, & K \geq 1 \\ 100K - 59.937(1 - K)\lambda, & K < 1 \end{cases} \quad (23)$$

$$E[Y|A = 2] - \lambda \mathbb{E}[h|A = 2] = 110 \quad (24)$$

$$E[Y|A = 3] - \lambda \mathbb{E}[h|A = 3] = 80 - \lambda \left[ \frac{100}{\sqrt{2\pi}} e^{-\frac{20^2}{2 \times 100^2}} + \frac{20}{2} \left( \text{erf} \left( \frac{20}{\sqrt{2} \times 100} \right) - 1 \right) \right] \quad (25)$$

Clearly, the agent will never take action 3 as its expected HPU is smaller than that for action 2 for all  $\lambda$ . For action 1, for  $K < 1$  the expected HPU is also smaller than that for action 2, for all  $\lambda$ . For action 1 with  $K > 1$ , if  $\lambda < 12.002$  the optimal  $K = 20$ , otherwise it is 0. As a result, for  $\lambda < 11.93$  the agent chooses action 1 with  $K = 20$ , and otherwise chooses action 2.

## H

In this Appendix we derive an expression for the expected counterfactual harm in generalized additive models. To calculate the expected counterfactual harm we derive a solution for a broad class of SCMs, heteroskedastic additive noise models, which includes our GAM (11),

**Definition 12** (Heteroskedastic additive noise models). *For  $Y$ ,  $\text{Pa}(Y) = A \cup X$ , the mechanism  $y = f_Y(a, x)$  is a heteroskedastic additive noise model if  $Y$  is normally distributed with a mean and variance that are functions of  $a, x$ ,*

$$y = \mu(a, x) + e^Y \sigma(a, x), \quad e^Y \sim \mathcal{N}(0, 1) \quad (26)$$

1005 In Appendix [I](#) we show that the dose response model [\(11\)](#) can be parameterised as a heteroskedastic  
 1006 additive noise model and calculate the expected counterfactual harm using the following theorem,

1007 **Theorem 5** (Expected harm for heteroskedastic additive noise model). *For  $Y = f_Y(a, x, e^Y)$  where*  
 1008  *$f_Y$  is a heteroskedastic additive noise model (Definition [I2](#)) and default action  $A = \bar{a}$ , the expected*  
 1009 *harm is*

$$\mathbb{E}[h|a, x] = \frac{|\Delta\sigma|}{\sqrt{2\pi}} e^{-\frac{\Delta U^2}{2\Delta\sigma^2}} + \frac{\Delta U}{2} \left( \operatorname{erf} \left( \frac{\Delta U}{\sqrt{2}|\Delta\sigma|} \right) - 1 \right) \quad (27)$$

1010 where  $\operatorname{erf}(\cdot)$  is the error function,  $\Delta U = \mathbb{E}[U|a, x] - \mathbb{E}[U|\bar{a}, x]$ ,  $\Delta\sigma = \sigma(a, x) - \sigma(\bar{a}, x)$ .

1011 *Proof.* Note that if  $e^Y \sim \mathcal{N}(\mu, V)$  we can replace  $e^Y \rightarrow e'^Y = e^Y/\sqrt{V} - \mu$  and absorb these terms  
 1012 into  $f(a, x)$  and  $\sigma(a, x)$ . Hence we need only consider zero-mean univariate noise. In the following  
 1013 we use  $e^Y = \varepsilon \sim \mathcal{N}(0, 1)$  to denote the fact the the exogenous noise term is univariate normally  
 1014 distributed. We also use the fact that there are no unobserved confounders between  $A$  and  $Y$  to give  
 1015  $P(y|a, x) = P(y_a|x)$ . Calculating the expected counterfactual harm using gives

$$\mathbb{E}[h|a, x] = \int_y dy \int_{y^*} dy^* P(y, Y_{\bar{a}} = y^*, |a, x) \max(0, U(\bar{a}, x, y^*) - U(a, x, y)) \quad (28)$$

$$= \int_y dy \int_{y^*} dy^* P(Y_a = y, Y_{\bar{a}} = y^* | x) \max(0, U(\bar{a}, x, y^*) - U(a, x, y)) \quad (29)$$

$$= \int_{\varepsilon} P(\varepsilon) d\varepsilon \int_y dy \int_{y^*} dy^* P(Y_a = y, Y_{\bar{a}} = y^* | \varepsilon, a, x) \max(0, U(\bar{a}, x, y^*) - U(a, x, y)) \quad (30)$$

$$= \int_{\varepsilon} P(\varepsilon) d\varepsilon \int_y dy \int_{y^*} dy^* P(Y_a = y | \varepsilon, a, x) P(Y_{\bar{a}} = y^* | \varepsilon, a, x) \max(0, U(\bar{a}, x, y^*) - U(a, x, y)) \quad (31)$$

1016 Substituting in  $U(a, x, y) = y$  and  $P(y|\varepsilon, a, x) = \delta(y - f(a, x) - \varepsilon\sigma(a, x))$  gives,

$$\mathbb{E}[h|a, x] = \int d\varepsilon P(\varepsilon) \max\{0, f(\bar{a}, x) - f(a, x) + \varepsilon(\sigma(\bar{a}, x) - \sigma(a, x))\} \quad (32)$$

$$= \int d\varepsilon P(\varepsilon) \max(0, -(\mathbb{E}[U|a, x] - \mathbb{E}[U|\bar{a}, x]) - \varepsilon(\sigma(a, x) - \sigma(\bar{a}, x))) \quad (33)$$

1017 where we have used the fact that  $\mathbb{E}[U|a, x] = \int d\varepsilon P(\varepsilon) (f(a, x) + \varepsilon\sigma(a, x)) = f(a, x)$ . For ease  
 1018 of notation we use  $\Delta U = \mathbb{E}[U|a, x] - \mathbb{E}[U|\bar{a}, x]$ ,  $\Delta\sigma = \sigma(a, x) - \sigma(\bar{a}, x)$ . Next, we remove the  
 1019  $\max()$  by incorporating it into the bounds for the integral. If  $\Delta U > 0$  and  $\Delta\sigma > 0$ , this is equivalent  
 1020 to  $\varepsilon < -\Delta U/\Delta\sigma$  and hence,

$$\mathbb{E}[h|a, x] = \int_{\varepsilon < -\Delta U/\Delta\sigma} d\varepsilon P(\varepsilon) (-\Delta U - \varepsilon\Delta\sigma) \quad (34)$$

$$= -\Delta U \int_{-\infty}^{-\Delta U/\Delta\sigma} P(\varepsilon) d\varepsilon - \Delta\sigma \int_{-\infty}^{-\Delta U/\Delta\sigma} \varepsilon P(\varepsilon) d\varepsilon \quad (35)$$

$$(36)$$

1021 Using the standard Gaussian integrals

$$\int_a^b P(\varepsilon) d\varepsilon = \frac{1}{2} \left[ \operatorname{erf}\left(\frac{b}{\sqrt{2}}\right) - \operatorname{erf}\left(\frac{a}{\sqrt{2}}\right) \right] \quad (37)$$

$$\int_a^b \varepsilon P(\varepsilon) d\varepsilon = P(a) - P(b) \quad (38)$$

1022 where  $P(\varepsilon) = e^{-\varepsilon^2/2}/\sqrt{2\pi}$  and  $\operatorname{erf}(z)$  is the error function, we recover

$$\mathbb{E}[h|a, x] = \frac{-\Delta U}{2} \left[ \operatorname{erf}\left(\frac{-\Delta U}{\sqrt{2}\Delta\sigma}\right) - \operatorname{erf}(-\infty) \right] - \Delta\sigma [P(-\infty) - P(-\Delta U/\Delta\sigma)] \quad (39)$$

$$= \frac{\Delta U}{2} \left[ \operatorname{erf}\left(\frac{\Delta U}{\sqrt{2}\Delta\sigma}\right) - 1 \right] + \frac{\Delta\sigma}{\sqrt{2\pi}} e^{-\frac{\Delta U^2}{2\Delta\sigma^2}} \quad (40)$$

1023 where we have used  $\operatorname{erf}(-z) = -\operatorname{erf}(z)$  and  $P(-z) = P(z)$ . Similarly, if  $\Delta U > 0$ ,  $\Delta\sigma < 0$  then  
 1024 the  $\max()$  in (33) can be replaced with a definite intergral over  $\varepsilon > \Delta U/\Delta\sigma$  giving,

$$\mathbb{E}[h|a, x] = \int_{\varepsilon > \Delta U/\Delta\sigma} d\varepsilon P(\varepsilon) (-\Delta U - \varepsilon\Delta\sigma) \quad (41)$$

$$= -\Delta U \int_{-\Delta U/\Delta\sigma}^{\infty} P(\varepsilon) d\varepsilon - \Delta\sigma \int_{-\Delta U/\Delta\sigma}^{\infty} \varepsilon P(\varepsilon) d\varepsilon \quad (42)$$

$$= -\frac{\Delta U}{2} \left[ \operatorname{erf}(\infty) - \operatorname{erf}\left(\frac{-\Delta U}{\sqrt{2}\Delta\sigma}\right) \right] - \Delta\sigma \left[ P\left(\frac{-\Delta U}{\sqrt{2}\Delta\sigma}\right) - P(\infty) \right] \quad (43)$$

$$= \frac{\Delta U}{2} \left[ \operatorname{erf}\left(\frac{\Delta U}{\sqrt{2}|\Delta\sigma|}\right) - 1 \right] + \frac{|\Delta\sigma|}{\sqrt{2\pi}} e^{-\frac{\Delta U^2}{2\Delta\sigma^2}} \quad (44)$$

1025 Next, if  $\Delta U < 0$  and  $\Delta\sigma > 0$  we recover the same integral as (35), and if  $\Delta U < 0$  and  $\Delta\sigma < 0$  we  
 1026 recover the same integral as (41). Hence the general solution for all  $\Delta\sigma$  is (44).

1027

□

## 1028 I

1029 In this Appendix we present the GAM dose response model including parameter values, and show  
 1030 that it corresponds to a heteroskedastic additive noise model and calculate the expected harm for a  
 1031 given dose.

1032 We follow the set-up described in [18], where outcome  $Y$  denotes the level of improvement in the  
 1033 symptoms of schizoaffective patients following treatment and compared to pre-treatment levels,  
 1034 measured in terms of the Positive and Negative Syndrome Scale (PANSS) [44]. The response of  $Y$   
 1035 w.r.t dose  $A$  (Aripiprazole mg/day) is determined using a generalized additive model fit with a cubic  
 1036 splines regression and random effects,

$$y = \theta_1 a + \theta_2 f(a) + \varepsilon_0 \quad (45)$$

1037 where the parameters  $\theta_i$  are random variables  $\theta_i \sim \mathcal{N}(\hat{\theta}_i, V_i)$ ,  $\varepsilon_0 \sim \mathcal{N}(0, V_0)$  is the sample noise,  
 1038 and the spline function  $f(a)$  is given by,

$$f(a) = \frac{(a - k_1)_+^3 - \frac{k_3 - k_1}{k_3 - k_2} (a - k_2)_+^3 + \frac{k_2 - k_1}{k_3 - k_2} (a - k_3)_+^3}{(k_3 - k_1)^2} \quad (46)$$

1039 where  $k_1, k_2, k_3$  are the knots at  $a = 0, 10$  and  $30$  respectively, with  $(u)_+ = \max\{0, u\}$ . In the  
 1040 following we assume for simplicity that  $\theta_1$  and  $\theta_2$  are independent. This hierarchical model can be  
 1041 expressed as an SCM with the mechanism for  $Y$  given by,

$$y = (\hat{\theta}_1 a + \hat{\theta}_2 f(a)) + \varepsilon_1 a + \varepsilon_2 f(a) + \varepsilon_0 \quad (47)$$

1042 where  $\varepsilon_i \sim N(0, V_i)$ . We will now reparameterise this as an equivalent SCM that is an additive  
 1043 heteroskedastic noise model. Using the identifies  $Z = kY, Y \sim \mathcal{N}(0, 1) \implies Z \sim \mathcal{N}(0, k^2)$ ,  
 1044 and  $Z = X + Y, X \sim \mathcal{N}(0, V_X), Y \sim \mathcal{N}(0, V_Y) \implies Z \sim \mathcal{N}(0, V_X + V_Y)$  (where  $V_X$  is the  
 1045 variance of  $X$  and likewise for  $V_Y, Y$ ), we can replace  $\varepsilon_1 a + \varepsilon_2 f(a) \rightarrow \varepsilon g(a)$  where  $\varepsilon \sim \mathcal{N}(0, 1)$   
 1046 and  $g(a) = \sqrt{a^2 V_1 + f(a)^2 V_2}$ . We can therefore reparameterise the mechanism for  $Y$  as

$$y = \mathbb{E}[U|a] + g(a)\varepsilon + \varepsilon_0 \quad (48)$$

1047 where we have used  $U(a, x, y) = U(a, y) = y$  and the fact that  $\varepsilon, \varepsilon_0$  are mean zero to give  
 1048  $\mathbb{E}[U|a] = \theta_1 a + \theta_2 f(a)$ . Finally, we note that the sample noise term  $\varepsilon_0$  cancels in the expression for  
 1049 the harm,

$$\mathbb{E}[h|a] = \int_y dy \int_{y^*} dy^* P(y, Y_{\bar{a}} = y^*, |a) \max(0, U(\bar{a}, y^*) - U(a, y)) \quad (49)$$

$$= \int_y dy \int_{y^*} dy^* P(Y_a = y, Y_{\bar{a}} = y^*) \max(0, U(\bar{a}, y^*) - U(a, y)) \quad (50)$$

$$= \int_{\varepsilon} P(\varepsilon) d\varepsilon \int_{\varepsilon_0} P(\varepsilon_0) d\varepsilon_0 \int_y dy \int_{y^*} dy^* P(Y_a = y, Y_{\bar{a}} = y^* | \varepsilon, \varepsilon_0, a) \max(0, U(\bar{a}, y^*) - U(a, y)) \quad (51)$$

1050

$$= \int_{\varepsilon} P(\varepsilon) d\varepsilon \int_{\varepsilon_0} P(\varepsilon_0) d\varepsilon_0 \int_y dy \int_{y^*} dy^* P(y, | \varepsilon, \varepsilon_0, a) P(Y_{\bar{a}} = y^*, | \varepsilon, \varepsilon_0) \max(0, U(\bar{a}, y^*) - U(a, y)) \quad (52)$$

1051 Substituting in  $P(Y_a = y | \varepsilon, \varepsilon_0) = \delta(y - f(a) + g(a)\varepsilon + \varepsilon_0)$  gives,

$$\mathbb{E}[h|a] = \int_{\varepsilon} P(\varepsilon) d\varepsilon \int_{\varepsilon_0} P(\varepsilon_0) d\varepsilon_0 \max(0, f(\bar{a}) + g(\bar{a})\varepsilon + \varepsilon_0 - f(a) - g(a)\varepsilon - \varepsilon_0) \quad (53)$$

$$= \int_{\varepsilon} P(\varepsilon) d\varepsilon \int_{\varepsilon_0} P(\varepsilon_0) d\varepsilon_0 \max(0, f(\bar{a}) - f(a) + (g(\bar{a}) - g(a))\varepsilon) \quad (54)$$

$$= \int_{\varepsilon} P(\varepsilon) d\varepsilon \max(0, f(\bar{a}) - f(a) + (g(\bar{a}) - g(a))\varepsilon) \quad (55)$$

1052 Therefore we can ignore the sample noise term when calculating the expected harm, instead calcu-  
 1053 lating the expected harm for the model  $Y = f(a) + g(a)\varepsilon$ . This is a heteroskedastic additive noise  
 1054 model, and therefore by Theorem 5 the expected harm is,

$$\mathbb{E}[h|a] = \frac{\Delta U}{2} \left[ \operatorname{erf} \left( \frac{\Delta U}{\sqrt{2}\Delta\sigma} \right) - 1 \right] + \frac{\Delta\sigma}{\sqrt{2\pi}} e^{-\Delta U^2/2\Delta\sigma^2} \quad (56)$$

1055 where  $\Delta U = \mathbb{E}[U|a] - \mathbb{E}[U|\bar{a}]$ ,  $\Delta\sigma = g(a) - g(\bar{a})$  and  $g(a) = \sqrt{a^2 V_1 + f(a)^2 V_2}$

1056 The resulting curves presented in Figure 2 are calculated using (56) and the parameter values  
 1057 taken from [18] (Table 1), which are fitted in a meta-analysis of the dose-responses reported in  
 1058 [19, 43, 59, 72, 91].

Table 1: Parameters for the hierarchical generalized additive dose-response model reported in [18]

| Parameter        | Value  |
|------------------|--------|
| $\hat{\theta}_1$ | 0.937  |
| $\hat{\theta}_2$ | -1.156 |
| $V_1$            | 0.03   |
| $V_2$            | 0.10   |

## J

In this Appendix we present proofs of Theorems 2, 3 and 4. First, we prove Theorem 2.

**Theorem 2:** For any utility functions  $U$ , environment  $\mathcal{M}$  and default action  $A = \bar{a}$  the expected HPU is never a harmful objective for  $\lambda > 0$ .

*Proof.* Let  $a_{\max} = \arg \max_a \{\mathbb{E}[U|a, x] - \lambda \mathbb{E}[h|a, x; \mathcal{M}]\}$ . If  $\exists a' \neq a_{\max}$  such that  $\mathbb{E}[U|a', x] \geq \mathbb{E}[U|a_{\max}, x]$  and  $\mathbb{E}[h|a', x; \mathcal{M}] < \mathbb{E}[h|a_{\max}, x; \mathcal{M}]$ , then  $\mathbb{E}[U|a_{\max}, x] + \lambda \mathbb{E}[h|a_{\max}, x; \mathcal{M}] < \mathbb{E}[U|a', x] + \lambda \mathbb{E}[h|a', x; \mathcal{M}] \forall \lambda > 0$  and so  $a_{\max} \neq \arg \max_a \{\mathbb{E}[U|a, x] - \lambda \mathbb{E}[h|a, x; \mathcal{M}]\}$ .  $\square$

Next, we prove theorems 3 and 4 by example, constructing distributional shifts that reveal if an objective function is harmful. To do this we make use of a specific family of structural causal models—counterfactually independent models.

**Definition 13** (counterfactual independence (CFI)).  $Y$  is counterfactually independent in with respect to  $A$  in  $\mathcal{M}$  if,

$$P(y_{a^*}^*, y_a | x) = \begin{cases} P(y_a | x) \delta(y_a - y_{a^*}^*) & a = a^* \\ P(y_{a^*}^* | x) P(y_a | x) & \text{otherwise} \end{cases} \quad (57)$$

Counterfactually independent models (CFI models) are those for which the outcome  $Y_a$  is independent to any counterfactual outcome  $Y_{a'}$ . Next we show that there is always a CFI model that can induce any factual outcome statistics.

**Lemma 1.** For any desired outcome distribution  $P(y|a, x)$  there is a choice of exogenous noise distribution  $P(e^Y)$  and causal mechanism  $f_Y(a, x, e^Y)$  such that  $Y$  is counterfactually independent with respect to  $A$ .

*Proof.* Consider the causal mechanism  $y = f_Y(a, x, e^Y)$  for some fixed  $X = x$ , and exogenous noise distribution  $P(E^Y = e^Y)$ . Let the noise term be described by the random field  $E^Y = \{E^Y(a, x) : a \in A, x \in X\}$ , with  $P(E^Y = e^y) = \times_{a \in A, x \in X} P(E^y(a, x) = e^y(a, x))$  and with  $\text{dom}(E^Y(a, x)) = \text{dom}(Y) \forall A = a, X = x$ . I.e. we choose the noise distribution to be joint state over mutually independent noise variables, one for every action  $A = a$  and context  $X = x$ , and where each of these variables has the same domain as  $Y$ . Next, we choose the causal mechanism,

$$f_Y(a, x, e^Y) = e^Y(a, x) \quad (58)$$

i.e. the value of  $Y$  for action  $A = a$  and context  $X = x$  is the state of the independent noise variable  $E^Y(a, x)$ . By construction this is a valid SCM, and we note that the factual distributions (calculated with (4)) are given simply by,

$$P(y|a, x) = P(E^Y(a, x) = y) \quad (59)$$

Likewise applying our choice of mechanism and noise distribution to (4) gives (for  $a \neq a'$ ) the counterfactual distribution,

$$P(Y_a = y, Y_{a'} = y' | x) = P(E^Y(a, x) = y) P(E^Y(a', x) = y') \quad (60)$$

$$= P(Y_a = y | x) P(Y_{a'} = y' | x) \quad (61)$$



1089 and likewise gives  $P(y_a|x)\delta(y_a - y'_{a'})$  for  $a = a'$ . Finally, we note that we can choose any  
 1090  $P(y_a|x) = P(E^Y(a, x) = y)$ , hence there is a CFI model that induces any factual outcome  
 1091 distribution we desire.  $\square$

1092 Next, we show that in counterfactually independent models there are outcome distributional shifts  
 1093 that only change the expected harm of individual actions, without changing any other factual or  
 1094 counterfactual statistics.

1095 **Lemma 2.** *For  $\mathcal{M}$  and (context-dependent) default action  $A = \bar{a}(x)$ , if  $U$  is outcome dependent for*  
 1096 *the default action  $\bar{a}(x)$  and some other action  $a \neq \bar{a}(x)$ , then there are three outcome distributionally*  
 1097 *shifted environments  $\mathcal{M}_0, \mathcal{M}_+$  and  $\mathcal{M}_-$  such that;*

- 1098 1.  $\mathbb{E}[h|a, x; \mathcal{M}_-] < \mathbb{E}[h|a, x; \mathcal{M}_0] < \mathbb{E}[h|a, x; \mathcal{M}_+]$
- 1099 2.  $\mathbb{E}[h|b, x; \mathcal{M}_-] = \mathbb{E}[h|b, x; \mathcal{M}_0] = \mathbb{E}[h|b, x; \mathcal{M}_+] \forall b \neq a$
- 1100 3.  $P(y|a', x; \mathcal{M}_0) = P(y|a', x; \mathcal{M}_+) = P(y|a', x; \mathcal{M}_-) \forall a' \in A$ , including  $a, \bar{a}(x)$

1101 *Proof.* In the following we suppress the notation  $\bar{a}(x) = \bar{a}$ . To construct the environment  $\mathcal{M}_0$  we  
 1102 restrict to a binary outcome distribution for each action such that  $P(y_a|x)$  is completely concentrated  
 1103 on the highest and lowest utility outcomes,

$$Y_a = 1 \implies Y_a = \arg \max_y U(a, x, y) \quad (62)$$

$$Y_a = 0 \implies Y_a = \arg \min_y U(a, x, y) \quad (63)$$

$$1 = P(Y_a = 1|x; \mathcal{M}_0) + P(Y_a = 0|x; \mathcal{M}_0) \quad (64)$$

1104 Note that we abuse notation as the variables  $Y_a = 1$  and  $Y_b = 1$  will not be in the same state  
 1105 in general, and the states 1, 0 denote the max/min utility states under any given action, rather  
 1106 than a fixed state of  $Y$ . By Lemma 1 we can choose  $Y_a$  to be counterfactually independent with  
 1107 respect to  $A$ . Recalling our parameterization of CFI models in Lemma 1, with noise distribution  
 1108  $P(E^Y = e^Y) = \times_{a \in A, x \in X} P(E^Y(a, x) = e^Y(a, x))$ ,  $\text{dom}(E^Y(a, x)) = \text{dom}(Y)$ , and causal  
 1109 mechanism  $f_Y(a, x, e^Y) = e^Y(a, x)$ , therefore  $E^Y(a, x) \in \{0, 1\} \forall a, x$ . The expected harm for  
 1110 action  $\text{do}(A = a)$  is,

$$\mathbb{E}[h|a, x; \mathcal{M}_0] = \sum_{y_a=0}^1 \sum_{y_{\bar{a}}=0}^1 P(y_{\bar{a}}|x)P(y_a|x) \max\{0, U(\bar{a}, x, y_{\bar{a}}) - U(a, x, y_a)\} \quad (65)$$

1111 where we have used the fact that  $P(y_{\bar{a}}^*, y|a, x) = P(y_{\bar{a}}^*, y_a|x)$  and used counterfactual independence.  
 1112  $U(a, x, 0) < U(\bar{a}, x, 1)$  and so if we choose non-deterministic outcome distributions for  $P(y_a|x)$   
 1113 and  $P(y_{\bar{a}}|x)$  then (65) is strictly greater than 0.

1114 We can construct the desired  $\mathcal{M}_{\pm}$  by keeping the causal mechanism but changing the factorized  
 1115 exogenous noise distribution in  $\mathcal{M}$  to be,

$$P'(E^Y = e^Y; \mathcal{M}_+) = P(E^Y = e^Y; \mathcal{M}_0) + (-1)^{e^Y(a, x) - e^Y(\bar{a}, x)} \phi_+ \quad (66)$$

$$P'(E^Y = e^Y; \mathcal{M}_-) = P(E^Y = e^Y; \mathcal{M}_0) + (-1)^{e^Y(a, x) - e^Y(\bar{a}, x)} \phi_- \quad (67)$$

1116 where  $\phi_{\pm} \in \mathbb{R}$  are constants that satisfy the bounds  $\max\{-P(Y_{\bar{a}} = 1|x)P(Y_a = 1|x), -P(Y_{\bar{a}} =$   
 1117  $0|x)P(Y_a = 0|x)\} \leq \phi_{\pm} \leq \min\{P(Y_{\bar{a}} = 1|x)P(Y_a = 0|x), P(Y_{\bar{a}} = 0|x)P(Y_a = 1|x)\}$ . It is  
 1118 simple to check that for any  $\phi$  that satisfies these bounds we recover  $\sum_{e^Y} P'(E^Y = e^Y) = 1$ ,  
 1119  $P'(E^Y = e^Y) \geq 0 \forall e^Y$ , and therefore  $P'$  is a valid noise distribution. Keeping the same causal

1120 mechanism  $f_Y$  is  $\mathcal{M}_\pm$  as in  $\mathcal{M}_0$  gives  $P(y_a|x; \mathcal{M}_0) = P(y_a|x; \mathcal{M}_+) = P(y_a|x; \mathcal{M}_-)$  as,

$$P'(y_i|x) = \sum_{e^Y(0,x)=0}^1 \dots \sum_{e^Y(i-1,x)=0}^1 \sum_{e^Y(i+1,x)=0}^1 \dots \sum_{e^Y(|A|,x)=0}^1 \left[ \prod_{j=1}^{|A|} P(e^Y(j,x)) + (-1)^{e^Y(i,x)-e^Y(\bar{a},x)} \phi_\pm \right] \quad (68)$$

$$= P(e^Y(i,x)) + (-1)^{e^Y(i,x)-0} \phi_\pm + (-1)^{e^Y(i,x)-1} \phi_\pm \quad (69)$$

$$= P(e^Y(i,x)) = P(y_i|x) \quad (70)$$

1121 and likewise for  $i = \bar{a}$ . This implies that for any desired outcome statistics  $P(y_a|x)$  there is a model  
 1122 where  $Y_a \perp Y_{a'} \forall (a, a')$  where  $a \neq a'$  except for the pair  $a, \bar{a}$ , so long as  $P(y_{\bar{a}}|x)$  and  $P(y_a|x)$  are  
 1123 non-deterministic (if they are deterministic,  $\phi_\pm = 0$  and  $\mathcal{M}_0 = \mathcal{M}_\pm$ ). Because  $Y_{a'} \perp Y_{\bar{a}} \forall a' \neq a$ ,  
 1124 then  $H(a', x; \mathcal{M}_0) = H(a', x; \mathcal{M}_\pm) \forall a' \neq a$ . Also note that  $H(\bar{a}, x; \mathcal{M}) = 0$  for any  $U$  or  $\mathcal{M}$  if  
 1125  $P(a|x) = \delta(a - \bar{a})$ , as  $P(Y_{\bar{a}} = i, Y_a = k) = 0$  if  $i \neq k$  and if  $i = k$  (factual and counterfactual  
 1126 outcomes are identical) then the expected harm is zero. The only difference between  $\mathcal{M}_0$  and  $\mathcal{M}_\pm$  is  
 1127  $P(y_{\bar{a}}, y_a|x; \mathcal{M}_+) \neq P(y_{\bar{a}}, y_a|x; \mathcal{M}_-) \neq P(y_{\bar{a}}, y_a|x; \mathcal{M}_0)$ , which differ for  $\phi_+ \neq 0, \phi_- \neq 0$  and  
 1128  $\phi_+ \neq \phi_-$ . Substituting (66) and (67) into our expression for the expected harm as using the notation  
 1129  $\Delta_{y,y'} = \max\{0, U(\bar{a}, x, y) - U(a, x, y')\}$  gives,

$$\mathbb{E}[h|a, x; \mathcal{M}_\pm] = \mathbb{E}[h|a, x; \mathcal{M}_0] + \phi_\pm [\Delta_{00} + \Delta_{11} - \Delta_{10} - \Delta_{01}] \quad (71)$$

$$\mathbb{E}[h|a', x; \mathcal{M}_\pm] = \mathbb{E}[h|a', x; \mathcal{M}_0], \quad a' \neq a \quad (72)$$

1130 Now, as  $\max_y U(a, x, y) > \min_y U(\bar{a}, x, y)$  then  $\Delta_{01} = 0$ . For the coefficient of  $\phi_\pm$  in (71) to be  
 1131 zero, we would therefore require that  $\Delta_{00} + \Delta_{11} = \Delta_{10}$ . We know  $\Delta_{10} > 0$  because otherwise  
 1132  $\min_y U(a, x, y) > \max_y U(\bar{a}, x, y)$ , therefore the minimal value of  $\Delta_{10}$  is  $\max_y U(\bar{a}, x, 1) -$   
 1133  $\min_y U(a, x, y)$ . If  $\Delta_{00} \neq 0$  and  $\Delta_{11} \neq 0$  then  $\Delta_{00} + \Delta_{11} \geq \Delta_{10}$  implies  $\min_y U(\bar{a}, x, y) \geq$   
 1134  $\max_y U(a, x, y)$  which violates our assumptions, therefore  $\Delta_{00} + \Delta_{11} < \Delta_{10}$ . If  $\Delta_{00} = 0$  clearly  
 1135 we cannot have  $\Delta_{11} = \Delta_{10}$  as  $\min_y U(a, x, y) < \max_y U(a, x, y)$  by our assumptions, and likewise  
 1136 if  $\Delta_{11} = 0$  we cannot have  $\Delta_{00} = \Delta_{10}$  as this would imply  $\min_y U(\bar{a}, x, y) = \max_y U(\bar{a}, x, y)$   
 1137 which violates our assumptions. Therefore we can conclude that the coefficient in (71) is greater than  
 1138 zero.

1139 Therefore if we choose any  $0 < \phi_+ < \min\{P(Y_{\bar{a}} = 1|x)P(Y_a = 0|x), P(Y_{\bar{a}} = 0|x)P(Y_a =$   
 1140  $1|x)\}$  we get  $\mathbb{E}[h|a, x; \mathcal{M}_+] > \mathbb{E}[h|a, x; \mathcal{M}_0]$ , and any  $\max\{P(Y_{\bar{a}} = 1|x)P(Y_a = 1|x), P(Y_{\bar{a}} =$   
 1141  $0|x)P(Y_a = 0|x)\} < \phi_- < 0$ , we get  $\mathbb{E}[h|a, x; \mathcal{M}_-] < \mathbb{E}[h|a, x; \mathcal{M}_0]$ .  $\square$

1142 **Lemma 3.** For (context dependent) default action  $A = \bar{a}(x)$ ,  $\mathbb{E}[h|\bar{a}(x), x; \mathcal{M}] = 0 \forall \mathcal{M}$

1143 *Proof.* In the following we suppress the notation  $\bar{a}(x) = \bar{a}$ .

$$\mathbb{E}[h|\bar{a}, x; \mathcal{M}] = \int_{y^*, y} P(Y_{\bar{a}} = y^*, Y = y|\bar{a}, x; \mathcal{M}) \max\{0, U(\bar{a}, x, y^*) - U(\bar{a}, x, y)\} \quad (73)$$

$$= \int_{y^*, y} P(Y_{\bar{a}} = y^*, Y_{\bar{a}} = y|x; \mathcal{M}) \max\{0, U(\bar{a}, x, y^*) - U(\bar{a}, x, y)\} \quad (74)$$

$$= \int_{y^*, y} P(Y_{\bar{a}} = y|x; \mathcal{M}) \delta(y^* - y) \max\{0, U(\bar{a}, x, y^*) - U(\bar{a}, x, y)\} \quad (75)$$

$$= \int_y P(Y_{\bar{a}} = y|x; \mathcal{M}) \max\{0, U(\bar{a}, x, y) - U(\bar{a}, x, y)\} \quad (76)$$

$$= 0 \quad (77)$$

1144  $P(y|a, x) = P(y_a|x)$ .

1145  $\square$

**Theorem 3:** For any (context dependent) default action  $A = \bar{a}(x)$ , if there is a context  $X = x$  where the user’s utility function is outcome dependent for  $\bar{a}(x)$  and some other action  $a \neq \bar{a}(x)$ , then there is an outcome distributional shift such that  $U$  is harmful in the shifted environment.

*Proof.* For the expected utility to not be harmful by Definition 6 it must be that  $\mathbb{E}[h|a, x] > \mathbb{E}[h|b, x] \implies \mathbb{E}[U|a, x] < \mathbb{E}[U|b, x]$ . Given our assumption of outcome dependence, we know there is a context  $X = x$  such that the utility functions for  $\bar{a}(x)$  and  $a \neq \bar{a}(x)$  overlap, that is  $\min_y U(a, x, y) < \max_y U(\bar{a}(x), x, y)$  and  $\max_y U(a, x, y) > \min_y U(\bar{a}(x), x, y)$ . In the following we drop the notation  $\bar{a}(x) = \bar{a}$ . We can restrict our agent to choose between these two actions and construct an outcome distributional shift such that; i) The outcomes  $Y_a$  and  $Y_{\bar{a}}$  are binary with one outcome maximizing the utility for that action and the other minimizing the utility, i.e.  $Y_a \in \{\max_y U(a, x, y), \min_y U(a, x, y)\}$  and  $Y_{\bar{a}} \in \{\max_y U(\bar{a}, x, y), \min_y U(\bar{a}, x, y)\}$ , ii)  $\mathbb{E}[U|a, x] = \mathbb{E}[U|\bar{a}, x]$ , iii)  $P(y_a|x)$  and  $P(y_{\bar{a}}|x)$  are non-deterministic. This follows from the fact that the set of possible expected utility values for an action  $a$  is the set of mixtures over  $U(a, x, y)$  with respect to  $y$ , and as  $Y_a = 0, 1$  are the extremal points of this convex set, the expected utility for action  $a$  in context  $x$  can be written as  $P(Y_a = 0|x)U(a, x, 0) + P(Y_a = 1|x)U(a, x, 1)$ . Then, as the utility functions for  $a$  and  $\bar{a}$  overlap there is point in the intersection of these convex sets that is non-extremal (and hence, a non-deterministic mixture).

By Lemma 3 the default action causes zero expected harm. By Lemma 2 we can construct a shifted environment  $\mathcal{M}_0$  where the non-default action  $a \neq \bar{a}$  has non-zero harm for any non-deterministic  $P(y_a|x)$ . We can therefore construct  $\mathcal{M}_0$  such that i)  $\mathbb{E}[Y_a|x] = \mathbb{E}[Y_{\bar{a}}|x]$ , and ii)  $\mathbb{E}[h|a, x] > \mathbb{E}[h|\bar{a}, x]$ , violating our requirement that  $\mathbb{E}[h|a, x] > \mathbb{E}[h|b, x] \implies \mathbb{E}[U|a, x] < \mathbb{E}[U|b, x]$ .

□

**Theorem 4:** For any (context dependent) default action  $A = \bar{a}(x)$ , if there is a context  $X = x$  where the user’s utility function is outcome dependent for  $\bar{a}(x)$  and two other actions  $a_1, a_2 \neq \bar{a}(x)$ , then for any factual objective function  $J$  there is an outcome distributional shift such that maximizing the  $J$  is harmful in the shifted environment.

*Proof.* By assumption there is a context  $X = x$  for which the utility functions for  $a_1, a_2$  and  $\bar{a}(x)$  overlap. In the following we drop the notation  $\bar{a}(x) = \bar{a}$ . There is a choice of non-deterministic outcome distributions  $P(y_{\bar{a}}|x)$ ,  $P(y_{a_1}|x)$  and  $P(y_{a_2}|x)$  such that all three actions have the same expected utility. By Lemma 2 for any non-deterministic outcome distribution we can choose  $\mathcal{M}_0$  such that  $\mathbb{E}[h|a_1, x; \mathcal{M}_0] > 0$ , and  $\mathbb{E}[h|a_2, x; \mathcal{M}_0] > 0$ , and by Lemma 3  $\mathbb{E}[h|\bar{a}, x; \mathcal{M}] = 0 \forall \mathcal{M}$ . Therefore  $\exists \mathcal{M}_0$  that is an outcome distributional shift of the original environment  $\mathcal{M}$  such that  $\bar{a}, a_1, a_2$  have the same expected utility,  $\bar{a}$  has zero expected harm and  $a_1, a_2$  have non-zero expected harm.

If  $\mathbb{E}[h|a_1, x; \mathcal{M}_0] = \mathbb{E}[h|a_2, x; \mathcal{M}_0]$  then by Lemma 2 there are outcome-shifted environments  $\mathcal{M}_{\pm}$  such that  $\bar{a}, a_1$  and  $a_2$  have the same factual statistics as in  $\mathcal{M}_0$  and  $\mathbb{E}[h|a_2, x; \mathcal{M}_0] = \mathbb{E}[h|a_2, x; \mathcal{M}_{\pm}]$ , but the harm caused by  $a_1$  is increased(decreased) by some non-zero amount. Therefore in  $\mathcal{M}_{+}$   $a_1$  and  $a_2$  have the same expected utility but  $a$  has a strictly higher expected harm, and in order to be non-harmful it must be that  $\mathbb{E}[J|a_1, x; \mathcal{M}_{+}] < \mathbb{E}[J|a_2, x; \mathcal{M}_{+}]$ . Likewise in  $\mathcal{M}_{-}$   $a_1$  and  $a_2$  have the same expected utility but the expected harm for  $a_1$  is strictly lower than for  $a_2$ , therefore in order to be non-harmful it must be that  $\mathbb{E}[J|a_1, x; \mathcal{M}_{-}] > \mathbb{E}[J|a_2, x; \mathcal{M}_{-}]$ . Finally we note that  $\mathbb{E}[J|a, x; \mathcal{M}_{+}] = \mathbb{E}[J|a, x; \mathcal{M}_{-}] = \mathbb{E}[J|a, x; \mathcal{M}_0] \forall a \in A$  as the factual statistics are identical in  $\mathcal{M}_0, \mathcal{M}_{\pm}$ , i.e.  $P(y_a|x; \mathcal{M}_{+}) = P(y_a|x; \mathcal{M}_{-}) = P(y_a|x; \mathcal{M}_0)$ . Therefore any  $J$  must be harmful in either  $\mathcal{M}_{+}$  and  $\mathcal{M}_{-}$ , and therefore there is an outcome distributional shift  $\mathcal{M} \rightarrow \mathcal{M}_{+}$  or  $\mathcal{M} \rightarrow \mathcal{M}_{-}$  such that  $J$  is harmful in the shifted environment.

If  $\mathbb{E}[h|a_1, x; \mathcal{M}_0] \neq \mathbb{E}[h|a_2, x; \mathcal{M}_0]$ , assume without loss of generality that  $\mathbb{E}[h|a_1, x; \mathcal{M}_0] > \mathbb{E}[h|a_2, x; \mathcal{M}_0]$ . As  $\bar{a}, a_1$  and  $a_2$  have the equal expected utilities then so does any mixture of these actions, in  $\mathcal{M}_0$  and  $\mathcal{M}_{\pm}$ . Restrict the agent to choose between action  $a_2$  and a mixture of actions  $\bar{a}$  and  $a_1$ —i.e. a stochastic or ‘soft’ intervention [17, 68], which involves replacing the causal mechanism for  $A$  with a mixture  $\tau := q[A = a_1] + (1 - q)[A = a_0]$  where  $q$  is an independent binary noise term. By linearity the expected utility for this mixed action is  $\mathbb{E}[U_{\tau}|x] = q\mathbb{E}[U_{a_1}|x] + (1 - q)\mathbb{E}[U_{\bar{a}}|x] = \mathbb{E}[U_{a_1}|x]$  as all three actions have the same expected utility, and has an expected harm  $\mathbb{E}[h|\tau, x; \mathcal{M}_0] = q\mathbb{E}[h|a_1, x; \mathcal{M}] + (1 - q)\mathbb{E}[h|\bar{a}, x; \mathcal{M}] = q\mathbb{E}[h|a_1, x; \mathcal{M}]$  as  $\mathbb{E}[h|\bar{a}, x; \mathcal{M}] = 0 \forall \mathcal{M}$ . Therefore as  $\mathbb{E}[h|a_1, x; \mathcal{M}] > 0$  and  $\mathbb{E}[h|a_2, x; \mathcal{M}] > 0$  we can choose

1200  $p > 0$  such that  $\mathbb{E}[h|\tau, x; \mathcal{M}_0] = \mathbb{E}[h|a_2, x; \mathcal{M}_0]$ . Therefore in  $\mathcal{M}_0$ ,  $a_2$  and  $\tau$  have the same ex-  
 1201 pected harm and utility, and in  $\mathcal{M}_+$  they have the same expected utility but  $\tau$  is more harmful than  
 1202  $a_2$  as  $\mathbb{E}[h|a_1, x; \mathcal{M}_+] > \mathbb{E}[h|a_1, x; \mathcal{M}_0]$  and  $p > 0$ , and in  $\mathcal{M}_-$  they have the same expected utility  
 1203 but  $a_2$  is more harmful than  $\tau$ . As the factual statistics  $P(y_a|x)$  are identical for  $\mathcal{M}_0$  and  $\mathcal{M}_\pm$ , so is  
 1204 the value of any factual objective function across all three environments. Hence, any factual objective  
 1205 function must be harmful in either  $\mathcal{M}_+$  or  $\mathcal{M}_-$ .  $\square$

## 1206 K

1207 In this appendix we discuss related works; counterfactual fairness [49] and path-specific objectives  
 1208 [26], as well as discussing some deep learning implementations that are capable of supporting  
 1209 counterfactual inferences of the type used to estimate counterfactual harm. For the sake of generality  
 1210 our results are derived in the SCM framework, and so taken at face value they assume knowledge of  
 1211 the SCM for the data generating process. Often in complex domains we will not have access to the  
 1212 true SCM that describes the data generating process but some approximation. However, there have  
 1213 been several recent proposals for performing counterfactual inference using deep learning methods,  
 1214 with promising results in diverse complex domains including learning deep structural causal models  
 1215 for medical imaging [67], visual question answering [63], and vision-and-language navigation in  
 1216 robotics [66] and text generation [56]. These studies evidence that deep learning algorithms can  
 1217 learn to make good counterfactual inferences that can be used to support decision making without  
 1218 perfect knowledge of the underlying SCM (one notable exception being when the environment is  
 1219 simulated, in which case the precise SCM is known). This is somewhat analogous to the fact that  
 1220 human decision making often utilizes counterfactual reasoning for various cognitive tasks [23] (for  
 1221 example, it is important for legal and ethical reasoning [51]). This is in spite of the fact that humans  
 1222 clearly do not having access to perfect structural causal models of their environments, but have to  
 1223 learn good enough approximations through heuristics and inductive biases. While it is known that  
 1224 counterfactuals cannot be identified from data alone [82] but are only defined up to a structural causal  
 1225 models of the environment, clearly humans [32] and increasingly AI systems are capable of learning  
 1226 good structural causal models of real-world environments and using these to make counterfactual  
 1227 inferences capable of guiding actions and reasoning about harm.

1228 However, our proposed framework for dealing with harm does not come without limitations to be  
 1229 investigated in future work. Similar to other works on causal inference (see [79] for review), our  
 1230 current setup assumes that the SCM is known and all variables are observed when computing the  
 1231 counterfactual (no unobserved confounding), which may limit the applicability of our measure for  
 1232 harm to certain scenarios. Several methods have been proposed for results with similar restrictions  
 1233 (e.g. in counterfactual fairness [46]). One approach that is particularly appropriate for dealing with  
 1234 harm is bounding counterfactuals, which allows for tight upper bounds on the counterfactuals in  
 1235 equation (6) to be determined using a mix of observational and interventional data [98]. This would  
 1236 result in a tight upper bound to harm, which in its self would be sufficient to ensure that actions cause  
 1237 no more than some acceptable level of harm and so satisfy the desired harm aversion with certainty  
 1238 (perhaps at the expense of some further expected utility cost).

1239 We now briefly discuss two examples of current implementations of counterfactual reasoning in  
 1240 complex domains where our framework could be applied.

1241 **Example: medical imaging.** Consider a recent study developing a deep structural causal models  
 1242 for generating counterfactual images of brain CT scans in patients with multiple sclerosis (MS) [75].  
 1243 MS causes brain lesions and abnormalities, and CT scans of the brain can be used to predict health  
 1244 outcomes for patients including disease progression and long-term patient outcomes [89]. MS is  
 1245 known to have a wide range of demographic risk factors including smoking exposure to chemical  
 1246 pollutants, and these factors are known to cause artefacts in brain scans such as lesions independently  
 1247 of MS. To determine the harm caused by the patient by the disease one has to determine what the  
 1248 patient’s ‘healthy’ scan would look like (if they did not have MS), given their factual scans which  
 1249 encode information about latent factors such as smoking and exposure to environmental pollutants  
 1250 (which also contribute to negative health outcomes through causal pathways not mediated by MS).  
 1251 Translating to our framework, the counterfactual harm Definition 3 can be estimated by generating  
 1252 samples of counterfactual healthy images  $y^* \sim P(Y_a|a, y; \mathcal{M})$  where  $Y_a$  is the counterfactual image  
 1253 under the intervention that sets the latent variable for duration of symptoms to zero (as in used to  
 1254 generate healthy images in [75]),  $Y$  is the factual image,  $A = a$  is the known factual duration of

1255 symptoms and  $\mathcal{M}$  is the deep structural causal model derived in [75]. Finally, the counterfactual harm  
 1256 (6) can be estimated using a reasonable utility function  $U(y)$  such as the predicted quality adjusted  
 1257 life years (QALYs) for a given CT scan evaluated using a deep learning model for predicting patient  
 1258 outcomes [89]. The resulting harm measure would be the expected decrease in the expected QALYs  
 1259 caused by the presence of MS.

1260 **Example: reinforcement learning.** Consider a recent study where a reinforcement learning agent  
 1261 is trained to determine optimal treatment policies for major depression [90]. A structural causal  
 1262 model is learned for the Markov decision process and used to generate counterfactual explanations  
 1263 for patient outcomes. Sequential decision making in medicine is a good use-case for our framework  
 1264 as there are well defined default treatment policies  $\pi(\bar{a}|s)$  (e.g patients with certain medical history  
 1265 receive a standardized treatment), and there is increasing interest in using reinforcement learning  
 1266 techniques to improve patient outcomes by adapting treatments over time and personalizing them to  
 1267 patients (see for example [55, 96]). However, care must be taken to ensure that any learned treatment  
 1268 policies are not overly harmful compared to the standardized treatment policies that the patient would  
 1269 have received. For example, some treatment policies may improve patient outcomes on average by  
 1270 benefiting some patients while causing other patients worse outcomes than they would have had  
 1271 (much like with the allergic reaction in Examples 1 & 2—indeed these heterogeneous responses to  
 1272 treatments are commonplace in psychiatry and medicine in general). To apply our framework for  
 1273 harm aversion the agent can be trained with a harm-averse Bellman equation,

$$Q_\lambda(a, s; \mathcal{M}) = \sum_{s'} P(s'|a, s) \left[ R(a, s, s') - \lambda h(a, s, s'; \mathcal{M}) + \gamma \sum_{a'} \pi(a'|s') Q(a', s'; \mathcal{M}) \right] \quad (78)$$

1274 where  $\mathcal{M}$  is an SCM of the Markov decision process (e.g. as derived in [90] and,

$$h(a, s, s'; \mathcal{M}) = \sum_{s^*} P(S'_{\bar{a}(s)} = s^* | a, s, s') \max\{0, R(\bar{a}(s), s, s^*) - R(a, s, s')\} \quad (79)$$

1275 where  $\bar{a}(s)$  is the deterministic default treatment choice that the patient would receive if they followed  
 1276 the standardized treatment rules. For  $\lambda = 1$  this reduces to the standard Bellman equation, but for  
 1277  $\lambda > 1$  the agent chooses a policy that maximizes the discounted cumulative HPU (Definition 4)  
 1278 rather than the reward, and so will avoid actions that achieve higher cumulative reward at the cost of  
 1279 harming patients (as illustrated in Section 6).

## 1280 K.1 Related work

1281 Counterfactual fairness deals with prediction tasks  $\hat{Y} : X \rightarrow Y$  where the desire is to have a predictor  
 1282  $\hat{Y}$  that is not unfairly influenced by a protected attribute  $A$  such as gender or race. Note  $A$  is a  
 1283 feature that typically cannot be intervened on, whereas in our setup  $A$  denotes an agent’s action.  
 1284 Counterfactual fairness quantifies this unfair influence causally, using the counterfactual constraint,

$$P(\hat{Y}_a = y | X = x, A = a) = P(\hat{Y}_{a'} = y | X = x, A = a) \quad \forall a' \in A, y \in \hat{Y} \quad (80)$$

1285 which states that the probability of predicting any given outcome should not be caused on average  
 1286 by the protected attribute  $A$ , where type causation is established using the counterfactual  $P(\hat{Y}_{a'} =$   
 1287  $y | X = x, A = a)$  which is the probability of  $\hat{Y}$  given  $A = a$  if  $A$  had been equal to  $a'$ . Note  
 1288 that the counterfactual in (80) does not deal with the joint statistics of the factual outcome  $\hat{Y}_a$  and  
 1289 the counterfactual outcome  $\hat{Y}_{a'}$ , as so is an example of type causality compared to harm which an  
 1290 example of actual causality [34]. Harm is conceptually distinct from fairness—for example, it is  
 1291 possible to apply a needlessly harmful action fairly—but the two measures can be used in tandem.  
 1292 For example, one could quantify if a action or decision was unfair, and whether or not the user was  
 1293 harmed due to this unfair action.

1294 Another perhaps more related use of counterfactual inference for ethical AI is path-specific objectives  
 1295 [26]. This work similarly refines expected utility theory in the CID framework to take into account  
 1296 the fact that we often want to maximize utility via specific causal pathways due to ethical constraints.



1297 For example we can consider a simple model where the agent’s action  $A$  influences user feedback  
 1298  $Y$  (and utility  $U(y)$ ) but also effects the users preferences  $H$  where  $A \rightarrow Y$ ,  $A \rightarrow H$  and  $H \rightarrow Y$ .  
 1299 To maximize utility without intentionally manipulating the user we must maximize along the causal  
 1300 pathway (1) :  $A \rightarrow Y$  without including contributions to the expected utility from the mediator  
 1301 pathway (2) :  $A \rightarrow H \rightarrow Y$ . This involves replacing the expected utility with its path-specific  
 1302 equivalent, much as our path-specific harm (Definition 9) generalizes our path-independent definition  
 1303 of harm (Definition 3). As such the path-specific expected utility is still agnostic to harm just as  
 1304 the expected utility is, although it could be combined with the path specific harm in [26] to give a  
 1305 path-specific variant of the HPU (Definition 4). This would allow for harm averse decision making  
 1306 where the necessary degree of harm-aversion  $\lambda_{(i)}$  differs depending on the causal path ( $i$ )—for  
 1307 example, if we desire agents that have a high aversion for being directly harmful, but a lower degree  
 1308 of harm-aversion for indirect harm mediated by the actions of other agents (as described in Appendix  
 1309 B).
